# Supplementary material for: Synergistic enhancement of hydrogen peroxide generation: WO3 photocatalyst modified with MXene and Au nanoparticles under visible light
Source: Royal Society of Chemistry journal article supplement (doi:10.1039/d4cy00443d), 2024-01-01
Supplement: d4cy00443d1.pdf [file d4cy00443d1.pdf]

## Supporting information

# Synergistic Enhancement of Hydrogen Peroxide Generation: WO<sub>3</sub> Photocatalyst Modified with MXene and Au Nanoparticles under Visible Light

Xiaoyu Sun<sup>a</sup>, Teruhisa Ohno<sup>a,\*</sup>

<sup>a</sup> Department of Applied Chemistry, Faculty of Engineering, Kyushu Institute of Technology, 1 – 1 Sensuicho, Tobata, Kitakyushu 804-8550, Japan

Teruhisa Ohno: [tohno@che.kyutech.ac.jp](mailto:tohno@che.kyutech.ac.jp)

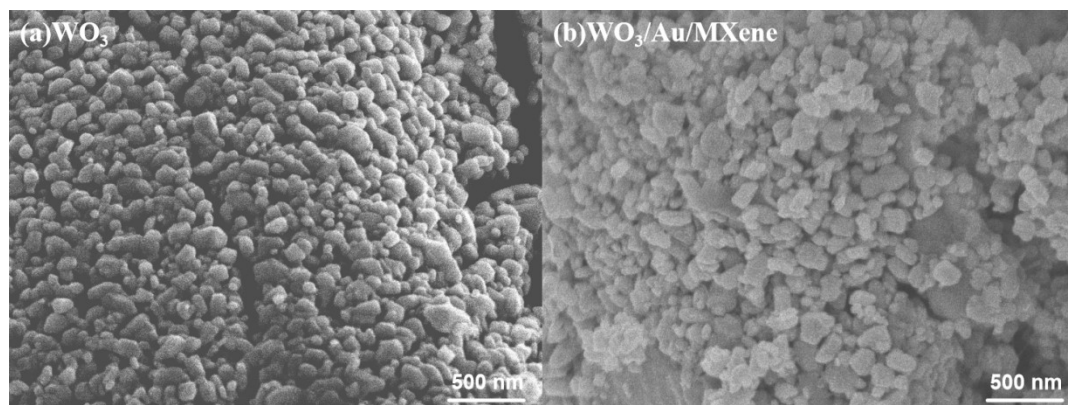

**Figure S1. (a)-(b) SEM images of pure WO<sub>3</sub> and WO<sub>3</sub>/Au/MXene.**

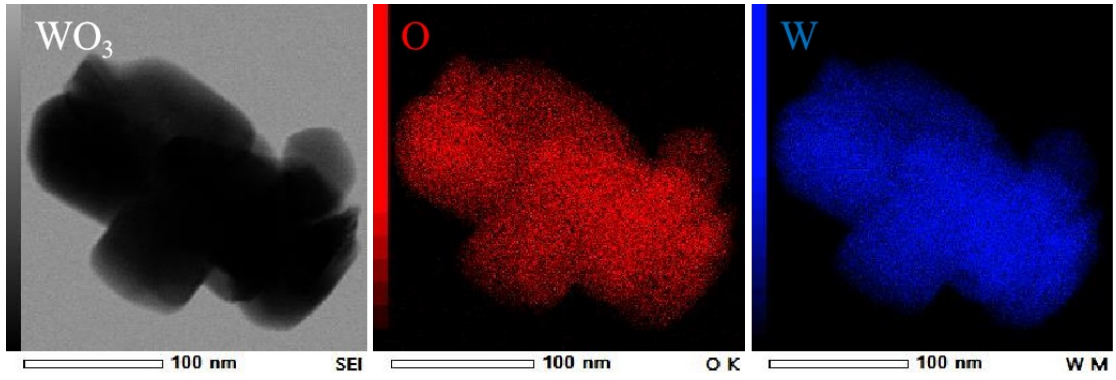

Figure S2. HR TEM and EDS mapping pictures of  $\text{WO}_3$ .

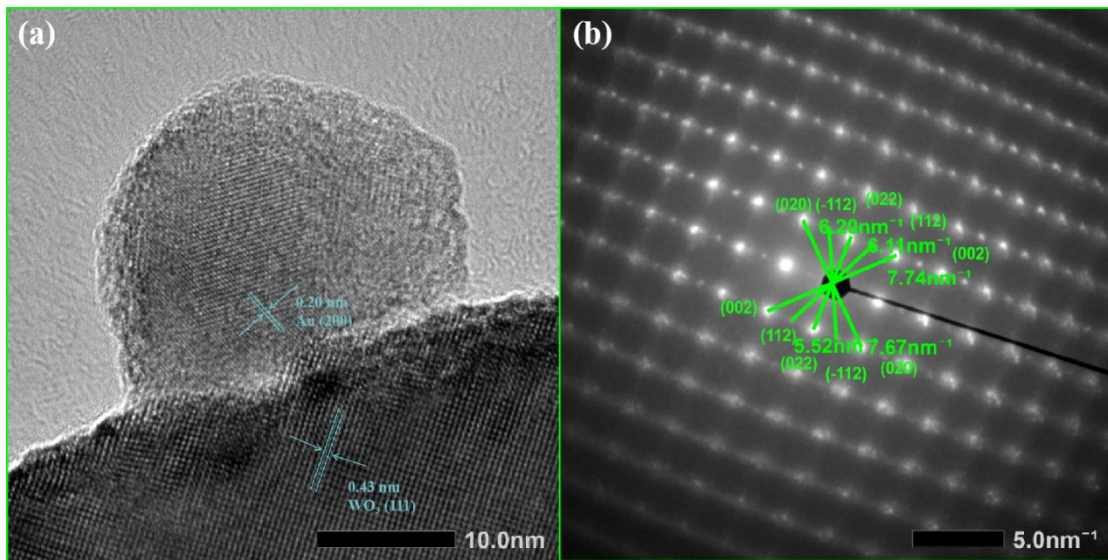

Figure S3. HR TEM lattice fringes and electron diffraction analysis pictures of  $\text{WO}_3/\text{Au}$ .

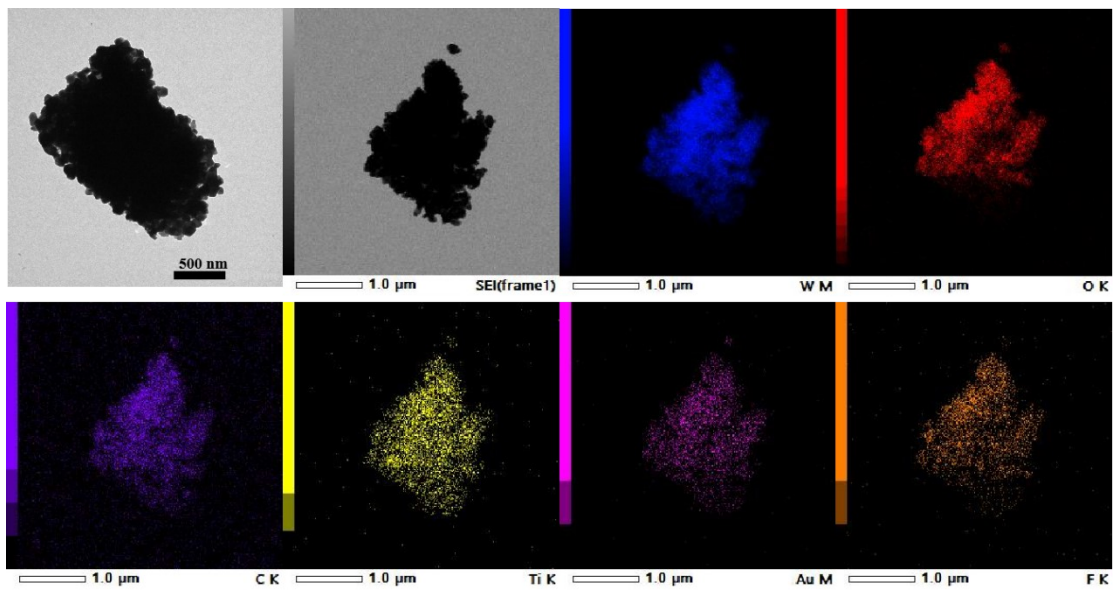

Figure S4. HR TEM and EDS mapping pictures of  $\text{WO}_3/\text{MXene}/\text{Au}$ .

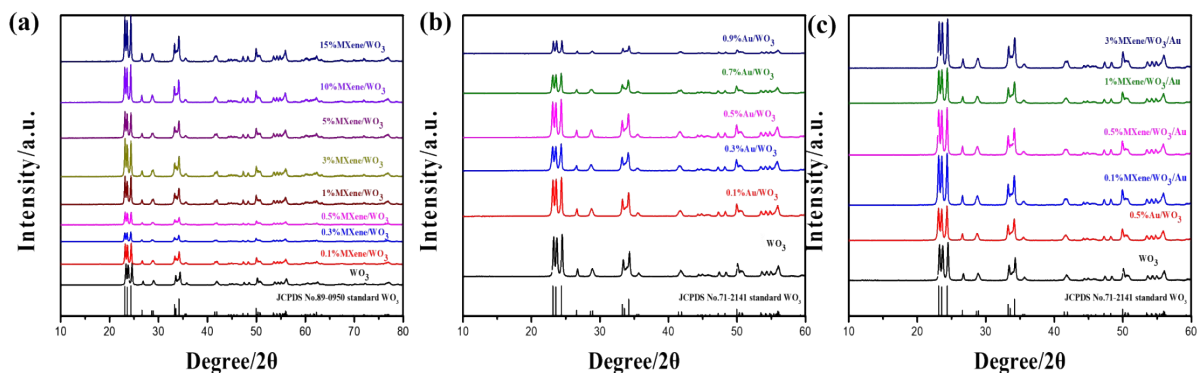

**Figure S5. (a) XRD data of  $WO_3$  and  $WO_3/MXene$  with different MXene contents, (b) XRD data of  $WO_3$  and  $WO_3/Au$  with different Au contents and (c) XRD data of  $WO_3$  and  $WO_3/Au/MXene$  with different MXene contents.**

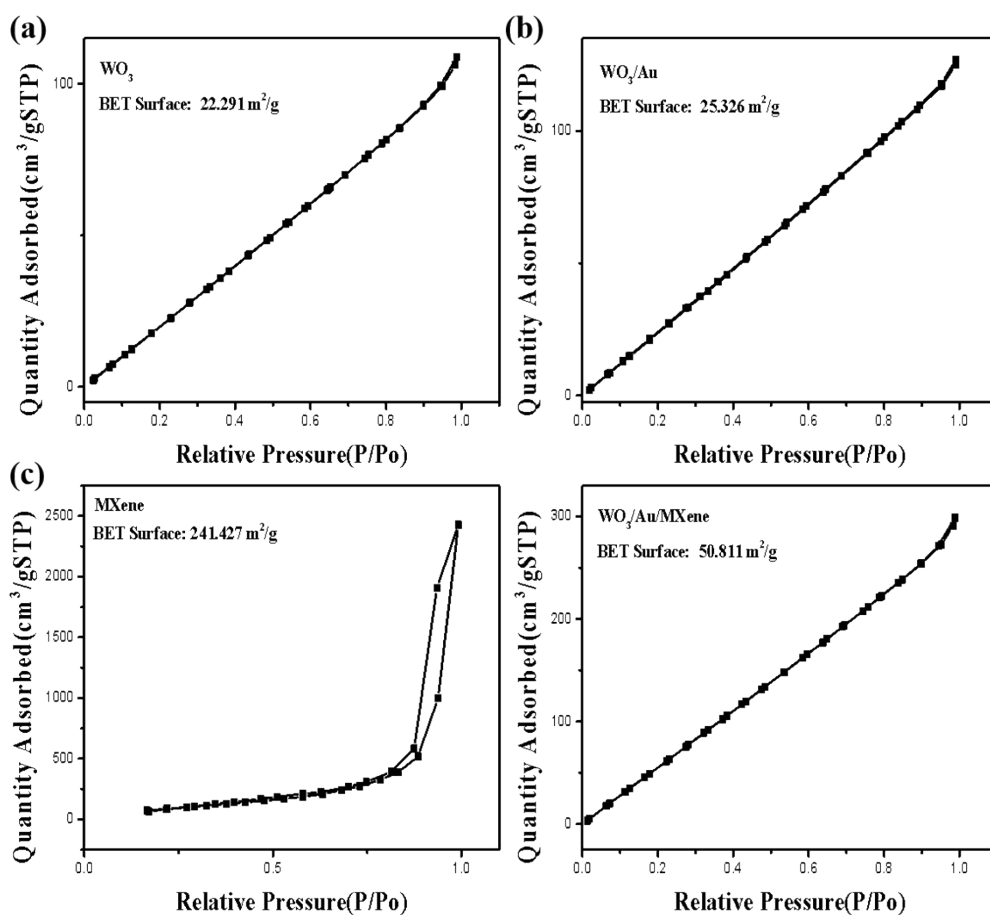

**Figure S6. Nitrogen adsorption-desorption isotherms of  $WO_3$ ,  $WO_3/Au$ , MXene, and  $WO_3/Au/MXene$ .**

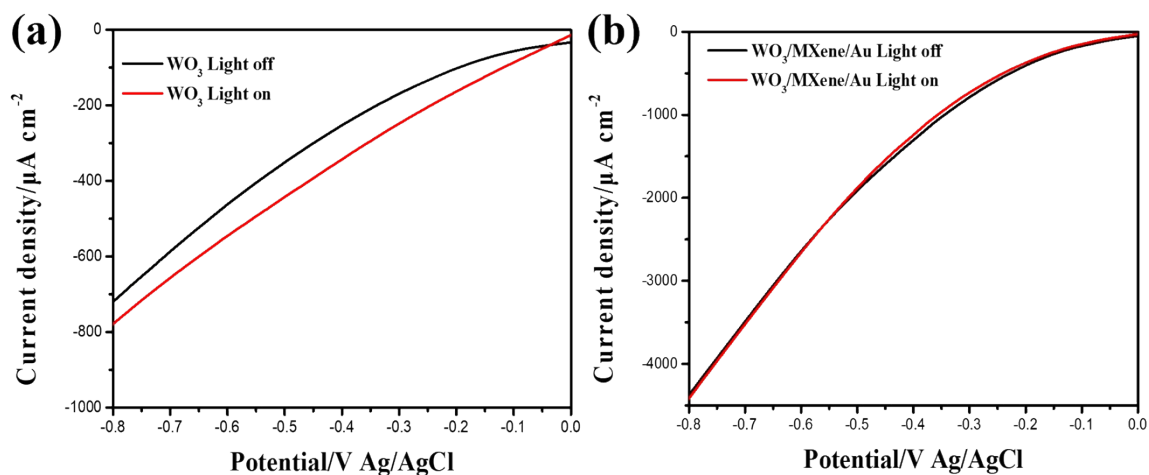

Figure S7. LSV data of (a)  $\text{WO}_3$  and (b)  $\text{WO}_3/\text{Au}/\text{MXene}$  at pH 6.09.

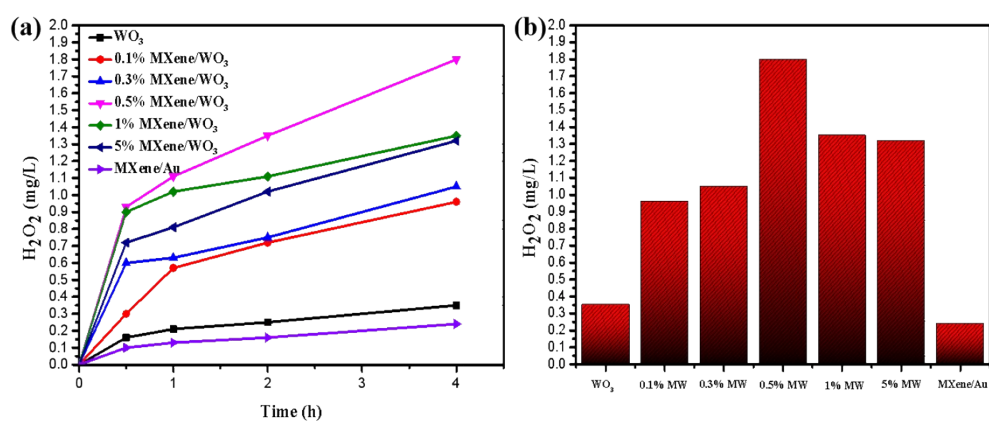

Figure S8.  $\text{H}_2\text{O}_2$  generation from  $\text{MXene}/\text{Au}$  and  $\text{WO}_3/\text{MXene}$  with varying  $\text{MXene}$  concentrations over time under visible light at pH 7.

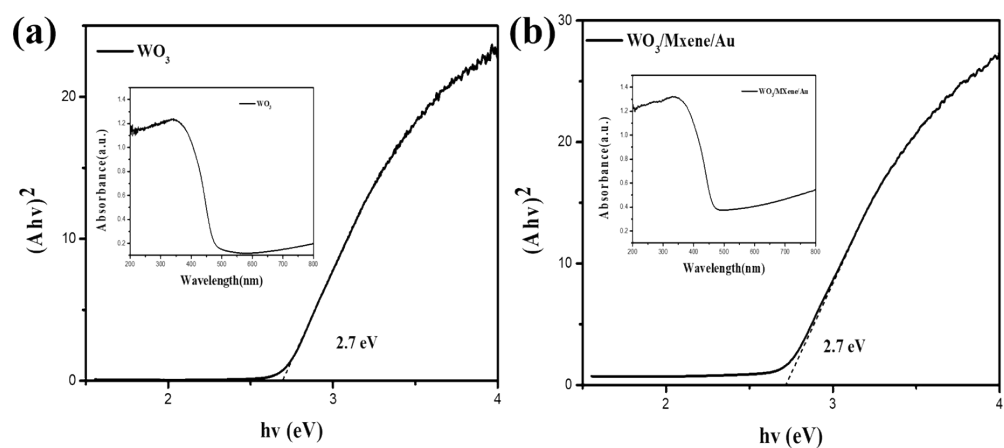

Figure S9. UV-vis data and tauc plots of (a) $WO_3$  and (b) $WO_3/MXene/Au$ .
